# Supplementary material for: Prognostic Impact of the Signet Ring Cell Type in Node-Negative Gastric Cancer
Source: PubMed Central journal article supplement (PMC4933873; doi:10.1038/srep26313), 2016-07-06
Supplement: srep26313-s2.pdf [file srep26313-s2.pdf]

# Supplementary Information

## **Prognostic Impact of Signet Ring Cell Type in Node Negative Gastric Cancer**

Pengfei Kong<sup>1,4</sup>, Ruiyan Wu<sup>1</sup>, Chenlu Yang<sup>1,3</sup>, Jianjun Liu<sup>1,2</sup>, Shangxiang Chen<sup>1,2</sup>, Xuechao Liu<sup>1,2</sup>, Minting Ye<sup>1,4</sup>, Min Ma<sup>1,2</sup>, Lin Jiao<sup>1</sup>, Xuan Li<sup>1</sup>, Wenzhuo He<sup>1,4</sup>, Qiong Yang<sup>1,4</sup>, Chang Jiang<sup>1,4</sup>, Fangxin Liao<sup>1,4</sup>, Youqing Zhan<sup>1,2</sup>, Zhiwei Zhou<sup>1,2</sup>, Liangping Xia<sup>\*1,4</sup>, Dazhi Xu<sup>\*1,2</sup>

1 State Key Laboratory of Oncology in South China, Collaborative Innovation Center for Cancer Medicine, Guangzhou, China, 2 Department of Gastric and Pancreatic Surgery, Sun Yat-sen University Cancer Center, Guangzhou, China. 3 Department of the Gynecologic Oncology surgery, Sun Yat-sen University Cancer Center, Guangzhou, China. 4 Department of the VIP region, Sun Yat-sen University Cancer Center, Guangzhou, China.

|                                                                                                                                                                           |
|---------------------------------------------------------------------------------------------------------------------------------------------------------------------------|
| <b>Supplemental Table 1.</b> Additional comparison of clinicopathologic characteristics between SRC and non-SRC LNs negative gastric cancer patients.                     |
| <b>Supplemental Table 2.</b> Comparison of clinicopathologic characteristics between excluded and enrolled LNs negative gastric cancer patients.                          |
| <b>Supplemental Table 3.</b> First site and the timing of recurrence (n = 98).                                                                                            |
| <b>Supplemental Table 4.</b> Total first site and the timing of recurrence (n = 138).                                                                                     |
| <b>Supplemental Table 5.</b> Multivariate analyses of prognostic factors for overall survival.                                                                            |
| <b>Supplemental Table 6.</b> Multivariate analyses of prognostic factors for relapse-free survival.                                                                       |
| <b>Supplemental Table 7.</b> Comparison of clinicopathologic characteristics between diffuse and non-diffuse LNs negative gastric cancer patients.                        |
| <b>Supplemental Figure 1.</b> Kaplan-Meier survival curves comparing years of overall survival between diffuse and non-diffuse LNs negative gastric cancer patients.      |
| <b>Supplemental Figure 2.</b> Kaplan-Meier survival curves comparing years of relapse-free survival between diffuse and non-diffuse LNs negative gastric cancer patients. |
| <b>Supplemental Figure 3.</b> Distribution of the number of lymph nodes examined for the entire cohort of 556 patients.                                                   |
| <b>Supplemental Figure 4.</b> Hematoxylin and eosin stain of different histologic type gastric carcinoma.                                                                 |

| Variable            | SRC                    |      | Non-SRC                 |      | P      |
|---------------------|------------------------|------|-------------------------|------|--------|
|                     | No. of Patients (n=90) | %    | No. of Patients (n=390) | %    |        |
| Tumor location      |                        |      |                         |      |        |
| Upper stomach       | 20                     | 22.2 | 131                     | 33.6 | 0.044  |
| Non-upper stomach   | 70                     | 77.8 | 259                     | 66.4 |        |
| AJCC stage          |                        |      |                         |      |        |
| 2                   | 29                     | 32.2 | 85                      | 21.8 | 0.040  |
| 1 + 3               | 61                     | 67.8 | 305                     | 78.2 |        |
| AJCC stage          |                        |      |                         |      |        |
| 1                   | 48                     | 53.3 | 275                     | 70.5 | 0.003  |
| 2 + 3               | 42                     | 46.7 | 115                     | 29.5 |        |
| Tumor stage         |                        |      |                         |      |        |
| T <sub>2</sub>      | 27                     | 30.0 | 64                      | 16.4 | 0.004  |
| Non-T <sub>2</sub>  | 63                     | 70.0 | 326                     | 83.6 |        |
| Tumor stage         |                        |      |                         |      |        |
| T <sub>3</sub>      | 29                     | 32.2 | 85                      | 21.8 | 0.040  |
| Non-T <sub>3</sub>  | 61                     | 67.8 | 305                     | 78.2 |        |
| Tumor stage         |                        |      |                         |      |        |
| T <sub>1a</sub>     | 16                     | 17.8 | 185                     | 47.4 | <0.001 |
| Non-T <sub>1a</sub> | 74                     | 82.2 | 205                     | 52.6 |        |

Abbreviation: SRC, Signet Ring Cell Carcinoma. AJCC, American Joint Committee on Cancer, 7th edition.

**Supplemental Table 1.** Additional comparison of clinicopathologic characteristics between SRC and non-SRC LNs negative gastric cancer patients.

| Variable                | Excluded               |      | Enrolled                |      | P     |
|-------------------------|------------------------|------|-------------------------|------|-------|
|                         | No. of Patients (n=76) | %    | No. of Patients (n=480) | %    |       |
| Age, years              | Mean                   | 57   | 56.2                    |      | 0.442 |
|                         | SD                     | 11.6 | 12.3                    |      |       |
| Sex                     | Men                    | 55   | 333                     | 69.4 | 0.687 |
|                         | Women                  | 21   | 147                     | 30.6 |       |
| Tumor location          | Upper stomach          | 31   | 221                     | 46.0 | 0.601 |
|                         | Middle stomach         | 23   | 111                     | 23.1 |       |
|                         | Lower stomach          | 17   | 114                     | 23.8 |       |
|                         | Overlapping            | 5    | 34                      | 7.1  |       |
| AJCC stage              | 1                      | 45   | 321                     | 66.9 | 0.347 |
|                         | 2                      | 21   | 116                     | 24.2 |       |
|                         | 3                      | 10   | 43                      | 8.9  |       |
| Tumor grade             | 1                      | 32   | 216                     | 45   | 0.221 |
|                         | 2                      | 23   | 172                     | 35.8 |       |
|                         | 3                      | 21   | 92                      | 19.2 |       |
| Tumor stage             | T <sub>1a</sub>        | 22   | 201                     | 41.9 | 0.129 |
|                         | T <sub>1b</sub>        | 8    | 31                      | 6.5  |       |
|                         | T <sub>2</sub>         | 18   | 91                      | 19.0 |       |
|                         | T <sub>3</sub>         | 17   | 114                     | 23.8 |       |
|                         | T <sub>4</sub>         | 11   | 43                      | 8.9  |       |
| Perineural invasion     | Negative               | 48   | 268                     | 55.8 | 0.263 |
|                         | Positive               | 28   | 212                     | 44.2 |       |
| Vascular invasion       | Negative               | 63   | 425                     | 88.5 | 0.186 |
|                         | Positive               | 13   | 55                      | 11.5 |       |
| Number of retrieved LNs | <15                    | 4    | 10                      | 2.1  | 0.110 |
|                         | ≥15                    | 72   | 470                     | 97.9 |       |
| Chemotherapy            | Yes                    | 24   | 135                     |      | 0.585 |
|                         | No                     | 52   | 345                     |      |       |

Abbreviation: AJCC, American Joint Committee on Cancer. 7th edition, LNs Lymph Nodes.

**Supplemental Table 2.** Comparison of clinicopathologic characteristics between excluded and enrolled LNs negative gastric cancer patients.

|              | SRC                       |      |       | Non-SRC                   |      |       | P     |
|--------------|---------------------------|------|-------|---------------------------|------|-------|-------|
|              | No. of Patients<br>(n=37) |      |       | No. of Patients<br>(n=71) |      |       |       |
|              | Early                     | Late | Total | Early                     | Late | Total |       |
| Liver        | 14                        | 1    | 15    | 15                        | 5    | 20    | 0.207 |
| Locoregional | 3                         | 1    | 4     | 1                         | 3    | 4     | 0.486 |
| Peritoneum   | 2                         | 1    | 3     | 8                         | 1    | 9     | 0.455 |
| Distant LNs  | 6                         | 0    | 6     | 12                        | 4    | 16    | 0.541 |
| Mixed type   | 8                         | 1    | 9     | 14                        | 8    | 22    | 0.220 |
| Total        | 33                        | 4    | 37    | 50                        | 21   | 71    | 0.032 |

Early: within 2 years after surgery ( $\leq 2$  years). Late: 4 years later after surgery ( $\geq 4$  years). Mixed type: liver or Peritoneum or locoregional and distant lymph node metastasis. LNs: lymph nodes

**Supplemental Table 3.** First site and the timing of recurrence (n = 108).

|              | SRC                       |      |        |       | Non-SRC                   |      |        |       |
|--------------|---------------------------|------|--------|-------|---------------------------|------|--------|-------|
|              | No. of Patients<br>(n=49) |      |        |       | No. of Patients<br>(n=99) |      |        |       |
|              | Early                     | Late | Middle | Total | Early                     | Late | Middle | Total |
| Liver        | 14                        | 1    | 6      | 21    | 15                        | 5    | 15     | 35    |
| Locoregional | 3                         | 1    | 3      | 7     | 1                         | 3    | 3      | 7     |
| Peritoneum   | 2                         | 1    | 1      | 4     | 8                         | 1    | 2      | 11    |
| Distant LNs  | 6                         | 0    | 1      | 7     | 12                        | 4    | 4      | 20    |
| Mixed type   | 8                         | 1    | 1      | 10    | 14                        | 8    | 4      | 26    |
| Total        | 33                        | 4    | 12     | 49    | 48                        | 21   | 28     | 99    |

Early: within 2 years after surgery ( $\leq 2$  years). Late: 4 years later after surgery ( $\geq 4$  years). Middle: Between 2 and 4 years. Mixed type: liver or Peritoneum or locoregional and distant lymph node metastasis. LNs: lymph nodes.

**Supplemental Table 4.** Total first site and the timing of recurrence (n = 148).

| Characteristic      | Hazard Ratio | 95% CI       | P      |
|---------------------|--------------|--------------|--------|
| SRC histology       | 1.13         | 0.70 to 1.85 | 0.612  |
| Age at diagnosis    | 1.03         | 1.01 to 1.04 | 0.006  |
| Female sex          | 1.65         | 1.04 to 3.09 | 0.022  |
| AJCC stage          |              |              |        |
| 1                   | 1.00         |              | <0.001 |
| 2                   | 2.64         | 1.64 to 4.24 |        |
| 3                   | 3.70         | 2.40 to 5.72 |        |
| Tumor stage         |              |              |        |
| T <sub>1a</sub>     | 1.00         |              | <0.001 |
| T <sub>3</sub>      | 2.15         | 1.21 to 3.16 |        |
| T <sub>4</sub>      | 3.09         | 1.54 to 6.19 |        |
| Perineural invasion | 1.64         | 1.14 to 2.36 | 0.008  |
| Vascular invasion   | 1.32         | 0.84 to 2.08 | 0.230  |
| Chemotherapy        | 1.77         | 1.14 to 2.74 | 0.011  |

Abbreviation: SRC, Signet Ring Cell Carcinoma. AJCC, American Joint Committee on Cancer, 7th edition.

**Supplemental Table 5.** Multivariate analyses of prognostic factors for overall survival.

| Characteristic      | Hazard Ratio | 95% CI       | P      |
|---------------------|--------------|--------------|--------|
| SRC histology       | 2.37         | 1.42 to 4.26 | 0.033  |
| Age at diagnosis    | 1.03         | 1.02 to 1.05 | <0.001 |
| AJCC stage          |              |              |        |
| 1                   | 1.00         |              | <0.001 |
| 2                   | 2.04         | 1.12 to 4.26 |        |
| 3                   | 3.89         | 2.59 to 5.84 |        |
| Tumor stage         |              |              |        |
| T <sub>1a</sub>     | 1.00         |              | <0.001 |
| T <sub>3</sub>      | 2.88         | 2.04 to 4.21 |        |
| T <sub>4</sub>      | 5.34         | 3.63 to 8.48 | <0.001 |
| Perineural invasion | 1.39         | 0.98 to 1.98 | 0.067  |
| Vascular invasion   | 2.16         | 1.41 to 3.30 | <0.001 |
| Chemotherapy        | 1.05         | 0.70 to 1.59 | 0.802  |

Abbreviation: SRC, Signet Ring Cell Carcinoma. AJCC, American Joint Committee on Cancer, 7th edition.

**Supplemental Table 6.** Multivariate analyses of prognostic factors for relapse-free survival.

| Variable                | Diffuse                 |      | Non-diffuse             |     | P     |       |
|-------------------------|-------------------------|------|-------------------------|-----|-------|-------|
|                         | No. of Patients (n=167) | %    | No. of Patients (n=269) | %   |       |       |
| Age, years              |                         |      |                         |     |       |       |
|                         | Mean                    | 56.8 | 57.7                    |     | 0.448 |       |
|                         | SD                      | 12.3 | 11.0                    |     |       |       |
| Sex                     |                         |      |                         |     |       |       |
|                         | Men                     | 122  | 73.1                    | 194 | 72.1  | 0.832 |
|                         | Women                   | 45   | 26.9                    | 75  | 27.9  |       |
| Tumor location          |                         |      |                         |     |       |       |
|                         | Upper stomach           | 57   | 34.1                    | 80  | 29.7  | 0.716 |
|                         | Middle stomach          | 44   | 26.3                    | 74  | 27.5  |       |
|                         | Lower stomach           | 50   | 29.9                    | 82  | 30.5  |       |
|                         | Overlapping             | 16   | 9.6                     | 33  | 12.3  |       |
| AJCC stage              |                         |      |                         |     |       |       |
|                         | 1                       | 107  | 64.1                    | 183 | 68.0  | 0.112 |
|                         | 2                       | 39   | 23.3                    | 68  | 25.3  |       |
|                         | 3                       | 21   | 12.6                    | 18  | 6.7   |       |
| Number of retrieved LNs |                         |      |                         |     |       |       |
|                         | <15                     | 11   | 6.6                     | 16  | 5.9   | 0.839 |
|                         | ≥15                     | 156  | 93.4                    | 253 | 94.1  |       |
| Chemotherapy            |                         |      |                         |     |       |       |
|                         | Yes                     | 52   | 31.1                    | 71  | 26.4  | 0.325 |
|                         | No                      | 115  | 68.9                    | 198 | 73.6  |       |

Abbreviation: SRC, Signet Ring Cell Carcinoma. SD, Standard Deviation. AJCC, American Joint Committee on Cancer, 7th edition, LNs, Lymph Nodes.

**Supplemental Table 7.** Comparison of clinicopathologic characteristics between diffuse and non-diffuse LNs negative gastric cancer patients.



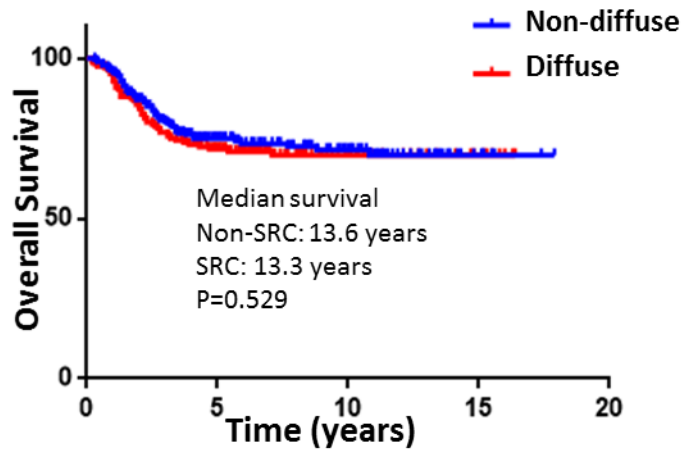

**Supplemental Figure 1.** Kaplan-Meier survival curves comparing years of overall survival between diffuse and non-diffuse LNs negative gastric cancer patients.

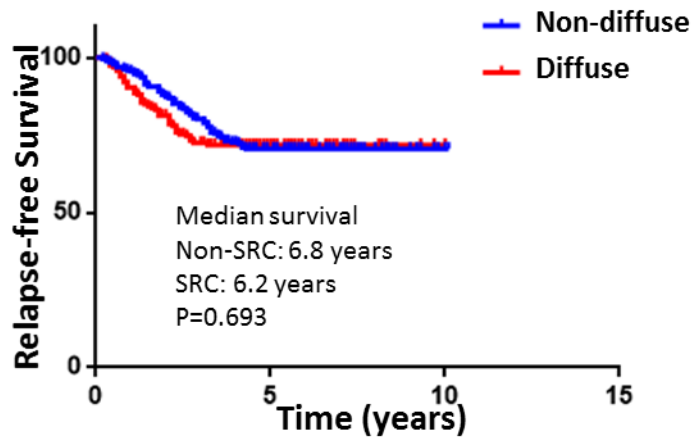

**Supplemental Figure 2.** Kaplan-Meier survival curves comparing years of relapse-free survival between diffuse and non-diffuse LNs negative gastric cancer patients.

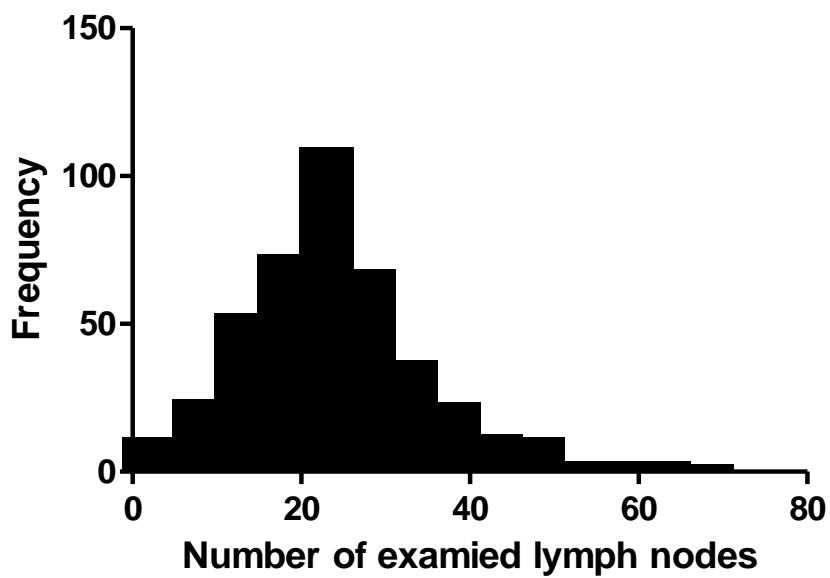

**Supplemental Figure 3.** Distribution of the number of lymph nodes examined for the entire cohort of 556 patients.

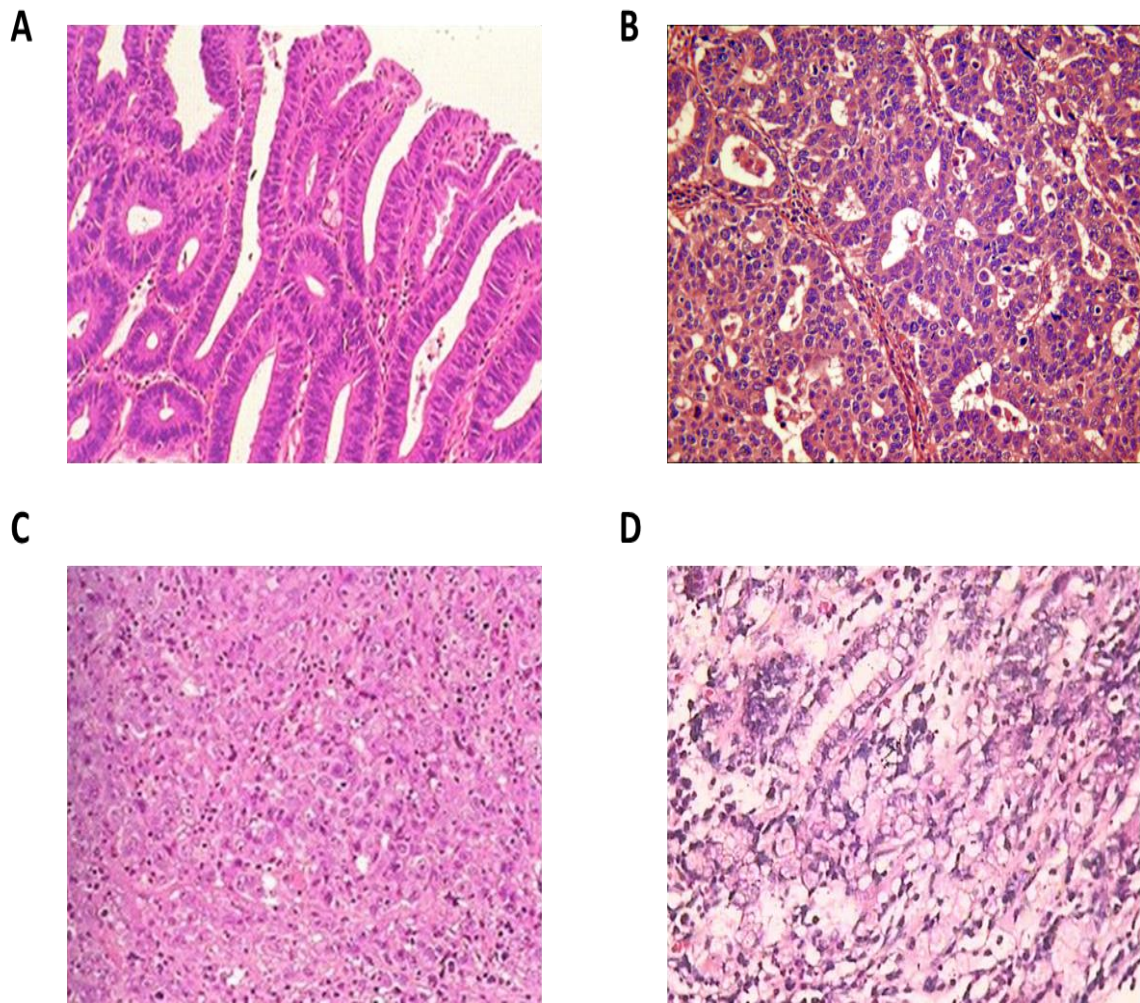

**Supplemental Figure 4.** Hematoxylin and eosin stain of different histologic type gastric carcinoma. (A) Grade 1 gastric carcinoma, (B) Grade 2 gastric carcinoma, (C) Grade 3 gastric carcinoma, (D) Signet ring cell gastric carcinoma.
